# Supplementary material
Source: PubMed Central journal article supplement (PMC7572814)
Supplement: NIHMS1628467-supplement-1.pdf [file NIHMS1628467-supplement-1.pdf]

**Supplementary Table 1.** The primer sequences used for real-time PCR

---

| <b>Gene</b> | <b>Forward Primer (5'-3')</b> | <b>Reverse Primer (5'-3')</b> |
|-------------|-------------------------------|-------------------------------|
| hMALAT1     | AGCTGTCCTTATAGGCTGGCCATT      | TGTTTACACTGCTCTGGGTCTGCT      |
| hMEG3       | CAGCCAGCTGTCCCTCTTAC          | CAAAGGGATCCTTCCATTCA          |
| hH19        | CACTGGCCTCCAGAGCCCGT          | CGTCTTGGCCTTCGGCAGCTG         |
| hHOTAIR     | GGTAGAAAAAGCAACCACGAAGC       | ACATAAACCTCTGTCTGTGAGTGCC     |
| hXIST       | GTGCTTTTTCGTGTTGGGTTT         | CCCAGGTCTTCGCTGAGTAG          |
| hCYP1A1     | TCGGCCACGGAGTTTCTTC           | GGTCAGCATGTGCCCAATCA          |
| hACTIN      | GTCTGCCTTGGTAGTGGATAATG       | TCGAGGACGCCCTATCATGG          |
| mMALAT1     | CCTAACGACTAGCATTGGCA          | GCACTCTTTCCTGGGCTATC          |
| mCYP1A1     | GACCCTTACAAGTATTTGGTCGT       | GGTATCCAGAGCCAGTAACCT         |
| mActin      | ATGGTTGACGATGAGCTGACT         | GACTCCGTGTTCAATGGGATAC        |

---

## Supplementary Figure 1

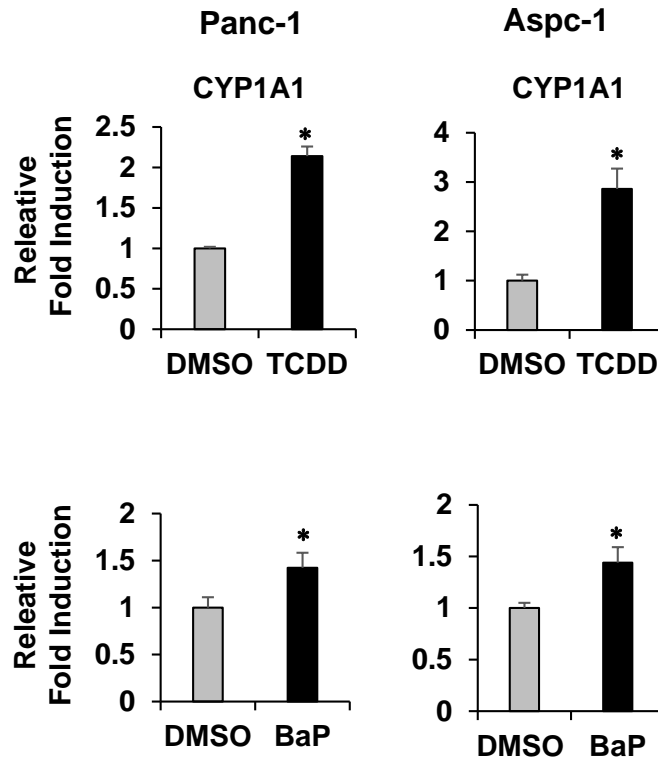

**Supplementary Figure 1.** Induction of CYP1A1, a representative AHR downstream target gene, by TCDD or BaP in Panc-1 and Aspc-1 human pancreatic cancer cells.

## Supplementary Figure 2

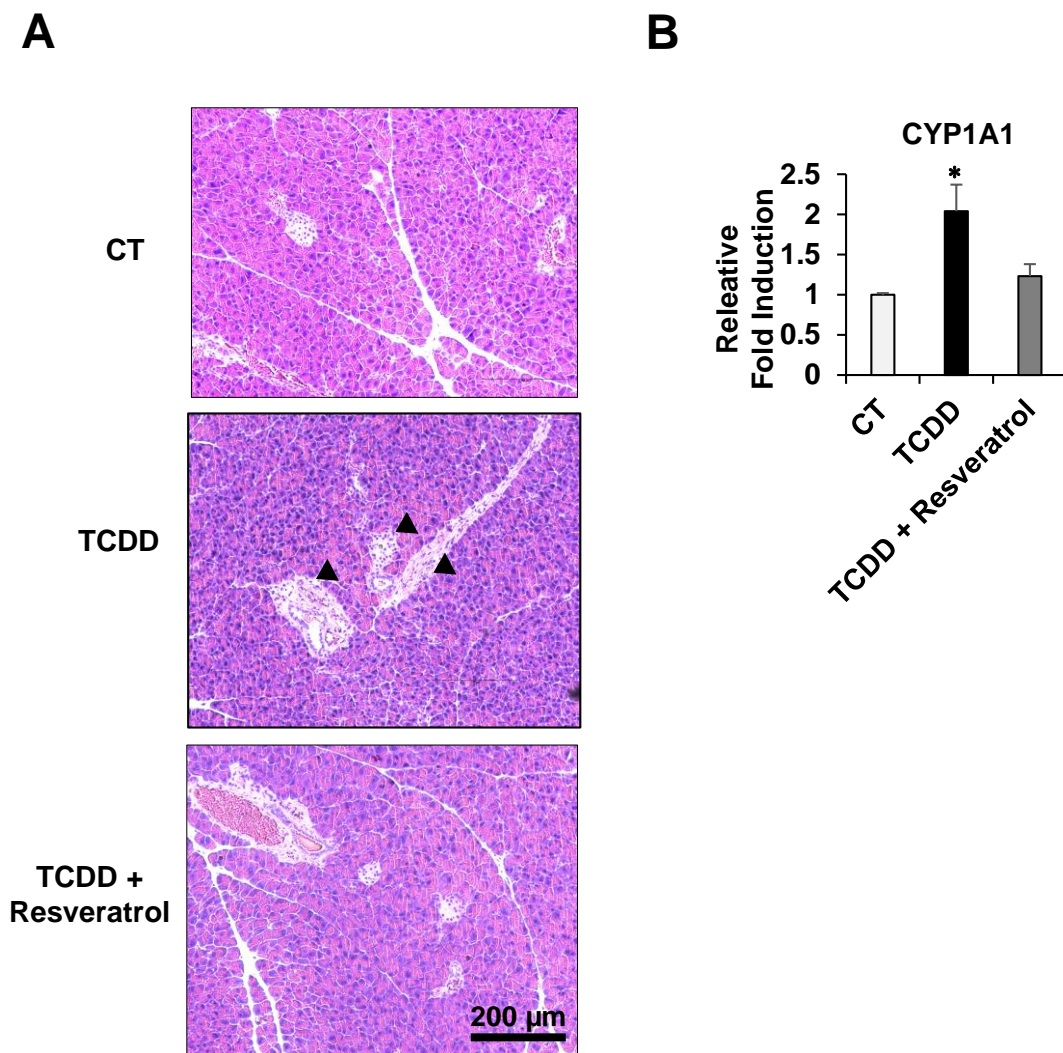

**Supplementary Figure 2.** Representative Haematoxylin and Eosin (H&E) staining images of pancreatic tissue sections treated with TCDD, TCDD plus Resveratrol, or control (CT). Inflammation and immune cell infiltration sites were shown as black arrows. Scale bar, 200  $\mu$ m. (A). The induction of CYP1A1 in the pancreatic tissues (B).
